# Supplementary material
Source: publisher figshare collection journal article supplement (https://gsajournals.figshare.com/ndownloader/files/13878989)
Supplement: Supplementary file 1 [file 13878989]

Table S7 Proteins involved in secretion system of *M. dispar* GS01

| Locus | Product | Gene | function | Protein length (aa) | Position |
| --- | --- | --- | --- | --- | --- |
| M.dispar-GS01_GM000008 | signal recognition particle receptor FtsY | *ftsY* | Protein export | 333 | 7838…8839 |
| M.dispar-GS01_GM000019 | lipoprotein signal peptidase (signal peptidase II) | *lspA* | Protein export | 208 | 19802…20428 |
| M.dispar-GS01_GM000029 | preprotein translocase subunit SecG | *secG* | Protein export | 77 | 34292…34525 |
| M.dispar-GS01_GM000055 | signal recognition particle subunit SRP54 | *ffh* | Protein export | 440 | 55750…57072 |
| M.dispar-GS01_GM000150 | SecD/SecF fusion protein | *secDF* | Protein export | 864 | 193141…195735 |
| M.dispar-GS01_GM000324 | preprotein translocase subunit SecY | *secY* | Protein export | 473 | 393239…394660 |
| M.dispar-GS01_GM000448 | preprotein translocase subunit SecA | *secA* | Protein export | 1029 | 578634…581723 |
| M.dispar-GS01_GM000505 | signal peptidase I | *lepB* | Protein export | 108 | 646148…646474 |
| M.dispar-GS01_GM000609 | signal peptidase I | *lepB* | Protein export | 109 | 791665…791994 |
| M.dispar-GS01_GM000788 | preprotein translocase subunit SecE | *secE* | Protein export | 78 | 1014821…1015057 |
| M.dispar-GS01_GM000823 | preprotein translocase subunit YidC | *yidC* | Protein export | 609 | 1063288…1065117 |
